# Supplementary material
Source: Springer Nature journal article supplement (https://www.springermedizin.de/resource/supplementary/12894_2002_17_MOESM6_ESM.pdf/9513714)
Supplement: MOESM6 [file 9513714]

**Additional file 6: Effect of large or small prostate volume at baseline on response**

**A. Prostate volume greater or equal to 40 cm<sup>3</sup> at baseline**

| Time-point (months)      |             | Outcome                            |                    |       |                              |                    |       |
|--------------------------|-------------|------------------------------------|--------------------|-------|------------------------------|--------------------|-------|
|                          |             | Prostate volume (cm <sup>3</sup> ) |                    |       | Max urinary flow rate (mL/s) |                    |       |
|                          |             | Number of trials                   | Number of patients | Value | Number of trials             | Number of patients | Value |
| Baseline                 | Finasteride | 12                                 | 1651               | 48.2  | 12                           | 2652               | 11.2  |
|                          | Placebo     |                                    | 1616               | 49.4  |                              | 2588               | 10.3  |
| 3                        | Finasteride | 5                                  | Insufficient data  |       | 9                            | 2512               | 11.5  |
|                          | Placebo     |                                    |                    |       |                              | 2488               | 10.7  |
| 6                        | Finasteride | 4                                  | 512                | 41.1  | 11                           | 2533               | 11.6  |
|                          | Placebo     |                                    | 524                | 48.4  |                              | 2538               | 10.7  |
| 12                       | Finasteride | 5                                  | 1023               | 41.9  | 8                            | 2551               | 11.9  |
|                          | Placebo     |                                    | 1023               | 52.1  |                              | 2485               | 10.7  |
| 18                       | Finasteride | 2                                  | Insufficient data  |       | 4                            | 1617               | 12.3  |
|                          | Placebo     |                                    |                    |       |                              | 1585               | 11.1  |
| 24                       | Finasteride | 4                                  | 812                | 35.2  | 5                            | 2932               | 12.5  |
|                          | Placebo     |                                    | 786                | 44.7  |                              | 2860               | 11.4  |
| 36                       | Finasteride | 1                                  | Insufficient data  |       | 1                            | 691                | 12.7  |
|                          | Placebo     |                                    |                    |       |                              | 608                | 11.0  |
| 48                       | Finasteride | 1                                  | Insufficient data  |       | 1                            | 588                | 12.7  |
|                          | Placebo     |                                    |                    |       |                              | 496                | 11.3  |
| Mean change at 12 months | Finasteride | 5                                  | 1023               | -6.3  | 8                            | 2551               | 0.7   |
|                          | Placebo     |                                    | 1023               | -2.7  |                              | 2485               | 0.4   |
| Mean change at 24 months | Finasteride | 4                                  | 812                | -13.0 | 5                            | 2932               | 1.3   |
|                          | Placebo     |                                    | 786                | -4.7  |                              | 2860               | 1.1   |

**B. Prostate volume smaller than 40 cm<sup>3</sup> at baseline**

| Time-point (months)      |             | Outcome                            |                    |       |                              |                    |       |
|--------------------------|-------------|------------------------------------|--------------------|-------|------------------------------|--------------------|-------|
|                          |             | Prostate volume (cm <sup>3</sup> ) |                    |       | Max urinary flow rate (mL/s) |                    |       |
|                          |             | Number of trials                   | Number of patients | Value | Number of trials             | Number of patients | Value |
| Baseline                 | Finasteride | 3                                  | 1785               | 38.0  | 3                            | 1445               | 11.1  |
|                          | Placebo     |                                    | 1782               | 38.9  |                              | 1445               | 10.8  |
| 3                        | Finasteride | 1                                  | 1450               | 37.1  | 1                            | 1110               | 12.1  |
|                          | Placebo     |                                    | 1452               | 40.0  |                              | 1115               | 11.5  |
| 6                        | Finasteride | 2                                  | 1475               | 35.4  | 1                            | 25                 | 12.6  |
|                          | Placebo     |                                    | 1477               | 40.1  |                              | 25                 | 11.6  |
| 12                       | Finasteride | 2                                  | 1001               | 30.7  | 1                            | 310                | 12.2  |
|                          | Placebo     |                                    | 1022               | 39.0  |                              | 305                | 11.8  |
| 18                       | Finasteride | 1                                  | 691                | 32.8  |                              | No data            |       |
|                          | Placebo     |                                    | 717                | 42.3  |                              |                    |       |
| 24                       | Finasteride | 1                                  | 691                | 30.5  | 1                            | 1110               | 12.6  |
|                          | Placebo     |                                    | 717                | 40.9  |                              | 1115               | 11.7  |
| 36                       | Finasteride | 0                                  | No data            |       | 0                            | No data            |       |
|                          | Placebo     |                                    |                    |       |                              |                    |       |
| 48                       | Finasteride | 0                                  | No data            |       | 0                            | No data            |       |
|                          | Placebo     |                                    |                    |       |                              |                    |       |
| Mean change at 12 months | Finasteride | 2                                  | 1001               | -7.3  |                              |                    |       |
|                          | Placebo     |                                    | 1022               | 0.1   |                              |                    |       |
| Mean change at 24 months | Finasteride |                                    | 691                | -7.5  |                              |                    | 1.5   |
|                          | Placebo     |                                    | 717                | 2.0   |                              |                    | 0.9   |
